# Supplementary material for: Blockade of CTLA-4 and Tim-3 pathways induces fetal loss with altered cytokine profiles by decidual CD4+T cells
Source: PubMed Central journal article supplement (PMC6325160; doi:10.1038/s41419-018-1251-0), 2019-01-08

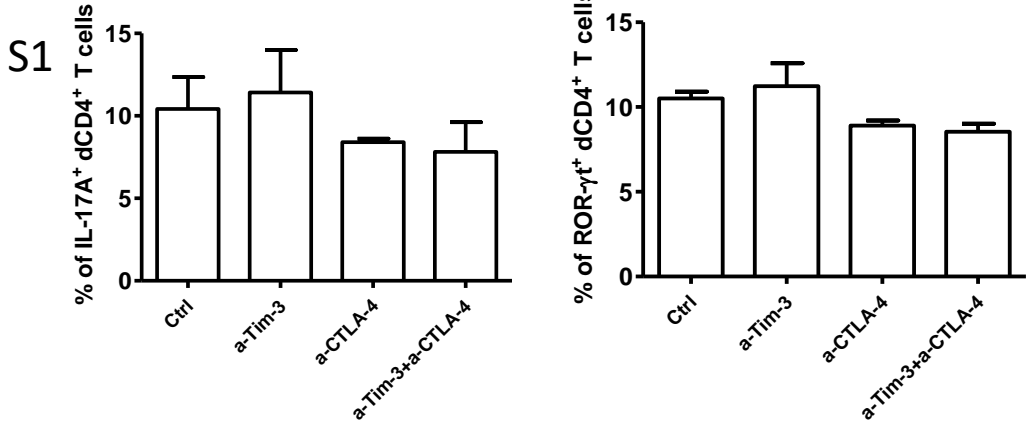

human

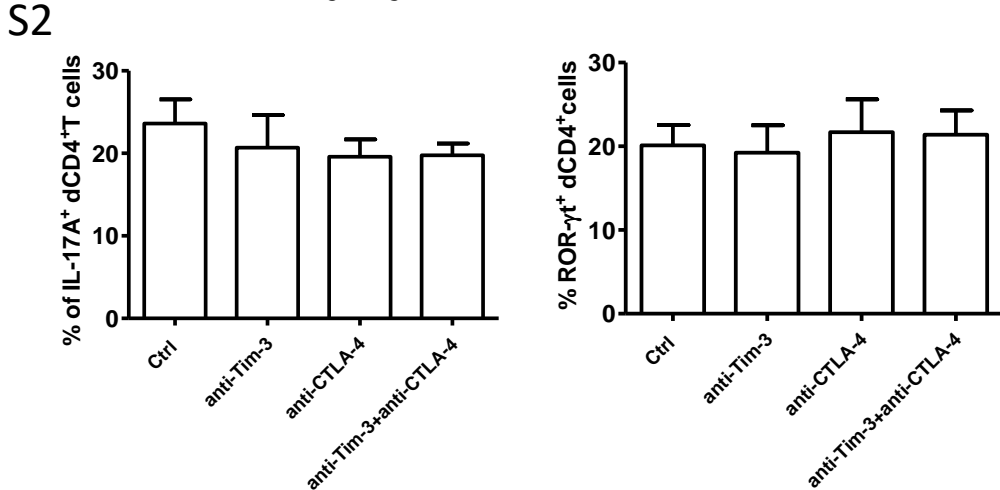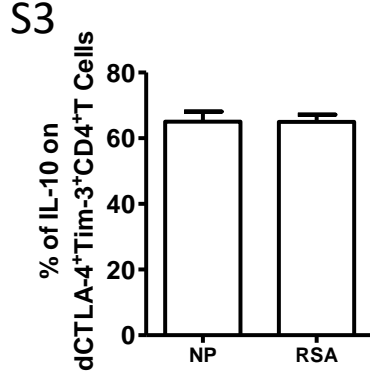

Supplement: 41419_2018_1251_MOESM1_ESM.pdf [file 41419_2018_1251_MOESM1_ESM.pdf]
